# Supplementary material
Source: Springer Nature journal article supplement (https://www.springermedizin.de/resource/supplementary/13054_2013_3025_MOESM4_ESM.pdf/9712420)

### Training Set

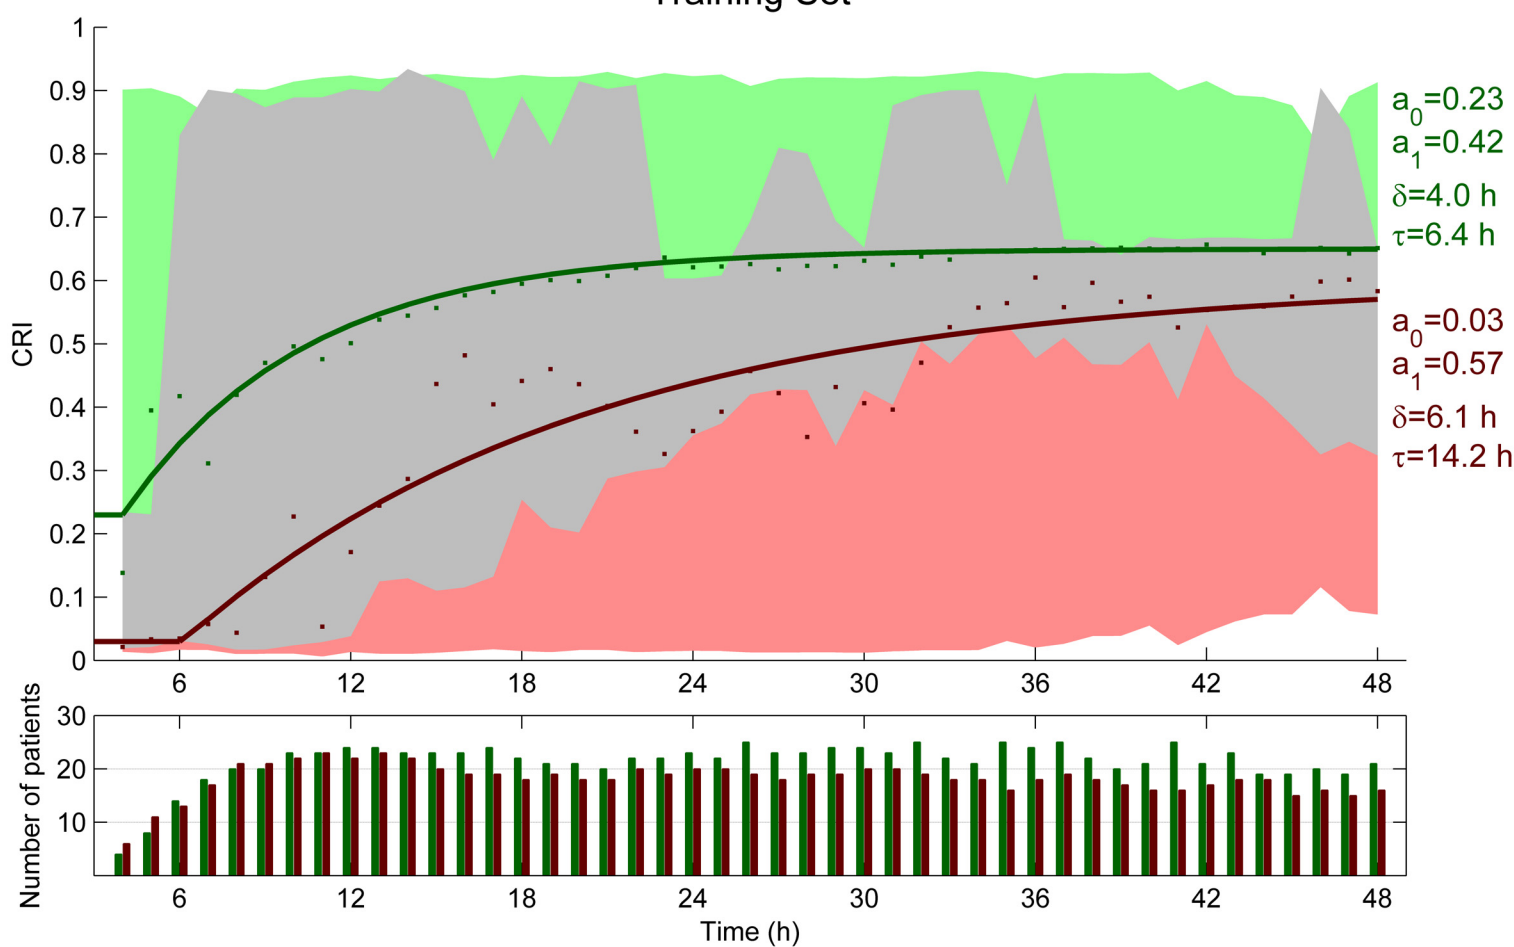

### Test Set

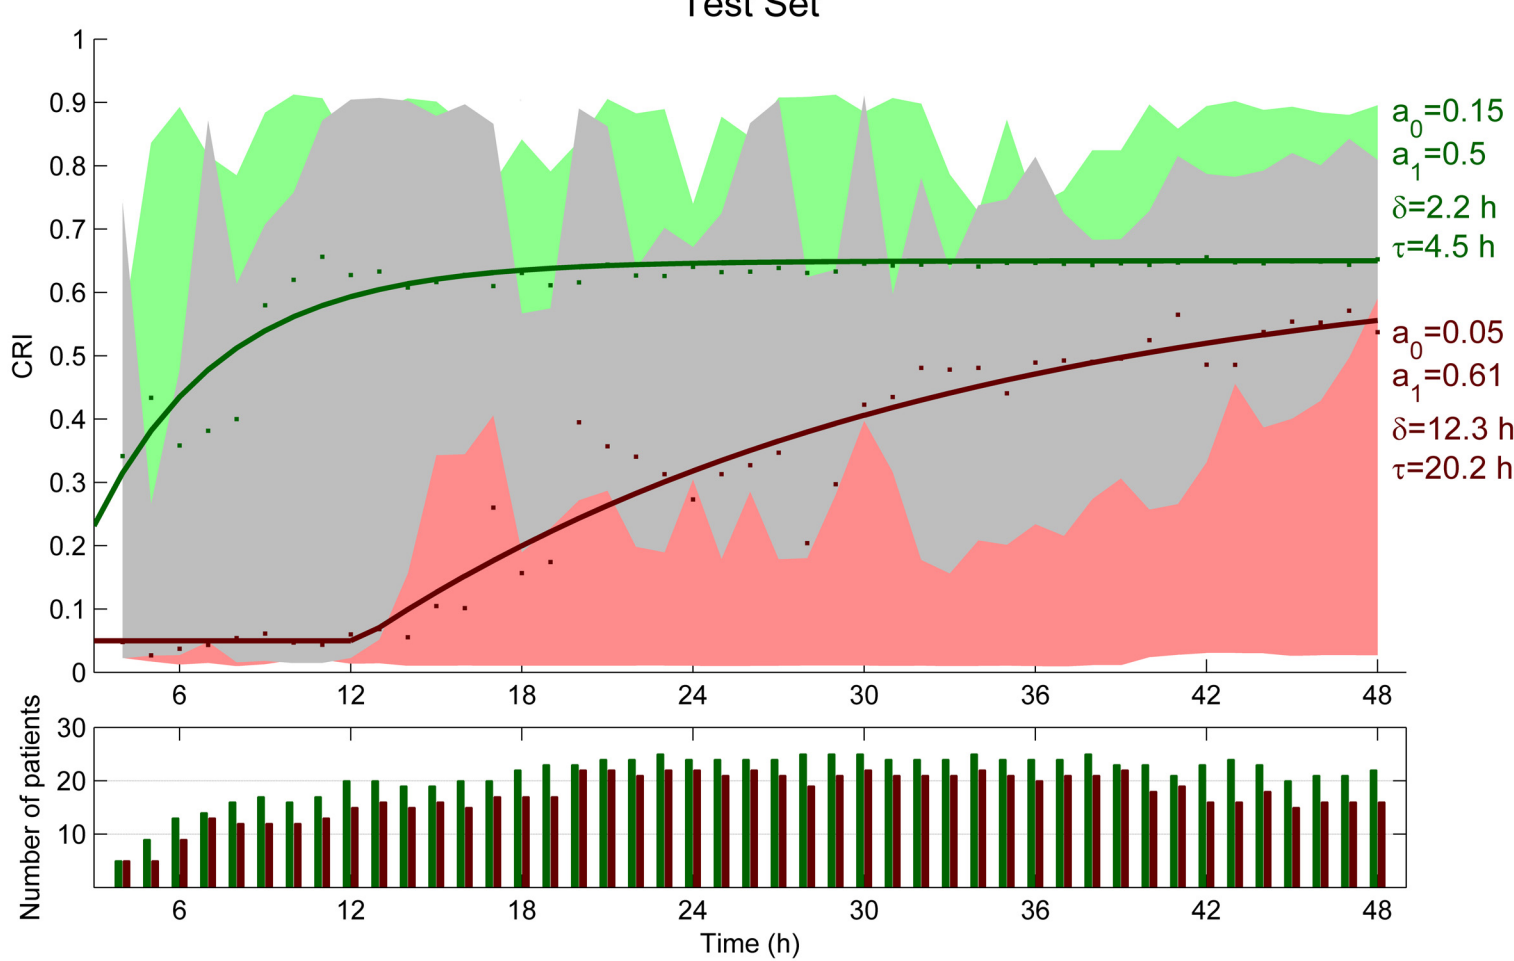

Supplement: MOESM4 [file 9712420]
